# Supplementary material for: Recruiting Young Gay and Bisexual Men for a Human Papillomavirus Vaccination Intervention Through Social Media: The Effects of Advertisement Content
Source: PubMed Central journal article supplement (PMC5473946; doi:10.2196/publichealth.7545), 2017-06-02
Supplement: publichealth_v3i2e33_app1.pdf [file publichealth_v3i2e33_app1.pdf]

|                                                 | n (%)      |
|-------------------------------------------------|------------|
| <b>Demographic Characteristics</b>              |            |
| Sexual identity                                 |            |
| Gay                                             | 124 (82.7) |
| Bisexual                                        | 26 (17.3)  |
| Age (years)                                     |            |
| 18-21                                           | 62 (41.3)  |
| 22-25                                           | 88 (58.7)  |
| Race / ethnicity                                |            |
| White, non-Hispanic                             | 85 (56.7)  |
| African American, non-Hispanic                  | 20 (13.3)  |
| Other race, non-Hispanic                        | 10 (6.7)   |
| Hispanic                                        | 35 (23.3)  |
| Marital status                                  |            |
| Other                                           | 120 (80.0) |
| Living with partner or married                  | 30 (20.0)  |
| Education level                                 |            |
| Some college or less                            | 94 (62.7)  |
| College degree or more                          | 56 (37.3)  |
| Household income                                |            |
| <\$50,000                                       | 114 (76.0) |
| ≥\$50,000                                       | 36 (24.0)  |
| Employment status                               |            |
| Not currently employed                          | 9 (6.0)    |
| Currently employed                              | 87 (58.0)  |
| Student                                         | 54 (36.0)  |
| <b>Health-Related Characteristics</b>           |            |
| Health insurance                                |            |
| None                                            | 27 (18.0)  |
| Covered by parents' insurance                   | 67 (44.7)  |
| Covered by other insurance                      | 56 (37.3)  |
| Had a routine medical check-up in the last year |            |
| No                                              | 80 (53.3)  |
| Yes                                             | 70 (46.7)  |
| Age at sexual debut <sup>a</sup> (years)        |            |
| <18                                             | 77 (51.3)  |
| ≥18                                             | 73 (48.7)  |
| Number of male sexual partners during lifetime  |            |
| 5 or fewer                                      | 53 (35.3)  |

|                          |            |
|--------------------------|------------|
| 6 or more                | 97 (64.7)  |
| HIV status               |            |
| Negative                 | 142 (94.7) |
| Positive                 | 8 (5.3)    |
| History of genital warts |            |
| No                       | 141 (94.0) |
| Yes                      | 9 (6.0)    |
| History of other STD     |            |
| No                       | 123 (82.0) |
| Yes                      | 27 (18.0)  |

---

*Note.* HIV = human immunodeficiency virus, STD = sexually transmitted disease.

<sup>a</sup>Age at first vaginal, anal, or oral intercourse.
